# Supplementary material for: Two Independent Contributions to Step Variability during Over-Ground Human Walking
Source: PubMed Central journal article supplement (PMC3756042; doi:10.1371/journal.pone.0073597), 2013-08-28
Supplement: pone.0073597.s001.pdf [file pone.0073597.s001.pdf]

**Supporting Information**  
**Two independent contributions to step variability during over-ground human walking**  
**S. H. Collins and A. D. Kuo**

**Table S1** Average step parameters ( $N = 14$ , mean  $\pm$  s.d.). Significant difference between conditions is indicated by asterisk (\*,  $P < 0.05$ ).

| Average        | units                        | Eyes Open<br>condition | Eyes Closed<br>condition |
|----------------|------------------------------|------------------------|--------------------------|
| Speed          | $\text{m}\cdot\text{s}^{-1}$ | $1.510 \pm 0.084$      | $1.442 \pm 0.104^*$      |
| Step length    | m                            | $0.792 \pm 0.036$      | $0.762 \pm 0.055^*$      |
| Step width     | m                            | $0.168 \pm 0.044$      | $0.179 \pm 0.047$        |
| Step frequency | s                            | $1.814 \pm 0.113$      | $1.806 \pm 0.119$        |
