# Supplementary material for: Two Independent Contributions to Step Variability during Over-Ground Human Walking
Source: PubMed Central journal article supplement (PMC3756042; doi:10.1371/journal.pone.0073597), 2013-08-28
Supplement: pone.0073597.s002.pdf [file pone.0073597.s002.pdf]

**Supporting Information**  
**Two independent contributions to step variability during over-ground human walking**  
**S. H. Collins and A. D. Kuo**

**Table S2** Step variabilities, expressed as variance ( $N = 14$ , mean  $\pm$  s.d.). Normalization units are given in terms of leg length  $L$  and gravitational acceleration  $g$ . Short-term variability is defined by applying a high-pass filter to step data, with a cut-off period of 30 steps (and long-term by a low-pass filter).

| Variance    | units | Eyes Open<br>condition  | Eyes Closed<br>condition |
|-------------|-------|-------------------------|--------------------------|
| Totals      |       |                         |                          |
| Speed       | $gL$  | $0.000133 \pm 0.000065$ | $0.000122 \pm 0.000058$  |
| Step length | $L^2$ | $0.000292 \pm 0.000121$ | $0.000377 \pm 0.000125$  |
| Step width  | $L^2$ | $0.000677 \pm 0.000221$ | $0.001380 \pm 0.000413$  |
| De-trended  |       |                         |                          |
| Step length | $L^2$ | $0.000163 \pm 0.000061$ | $0.000255 \pm 0.000079$  |
| Step width  | $L^2$ | $0.000700 \pm 0.000219$ | $0.001420 \pm 0.000418$  |
| Speed trend |       |                         |                          |
| Step length | $L^2$ | $0.000121 \pm 0.000097$ | $0.000125 \pm 0.000061$  |
| Step width  | $L^2$ | $0.000023 \pm 0.000028$ | $0.000034 \pm 0.000048$  |
| Short-term  |       |                         |                          |
| Step length | $L^2$ | $0.000173 \pm 0.000069$ | $0.000272 \pm 0.000090$  |
| Step width  | $L^2$ | $0.000590 \pm 0.000201$ | $0.001254 \pm 0.000421$  |
| Long-term   |       |                         |                          |
| Step length | $L^2$ | $0.000117 \pm 0.000081$ | $0.000101 \pm 0.000046$  |
| Step width  | $L^2$ | $0.000093 \pm 0.000044$ | $0.000154 \pm 0.000061$  |
