# Supplementary material for: Two Independent Contributions to Step Variability during Over-Ground Human Walking
Source: PubMed Central journal article supplement (PMC3756042; doi:10.1371/journal.pone.0073597), 2013-08-28
Supplement: pone.0073597.s003.pdf [file pone.0073597.s003.pdf]

**Supporting Information**  
**Two independent contributions to step variability during over-ground human walking**  
**S. H. Collins and A. D. Kuo**

**Table S3** Step variabilities, expressed as root-mean-square values ( $N = 14$ , mean  $\pm$  s.d.). Units are in SI, using the mean normalization factors to re-dimensionalize the data.

| RMS Variability | units                        | Eyes Open condition | Eyes Closed condition |
|-----------------|------------------------------|---------------------|-----------------------|
| Totals          |                              |                     |                       |
| Speed           | $\text{m}\cdot\text{s}^{-1}$ | $0.0343 \pm 0.0088$ | $0.0330 \pm 0.0073$   |
| Step length     | m                            | $0.0160 \pm 0.0034$ | $0.0183 \pm 0.0029$   |
| Step width      | m                            | $0.0245 \pm 0.0039$ | $0.0351 \pm 0.0053$   |
| De-trended      |                              |                     |                       |
| Step length     | m                            | $0.0120 \pm 0.0022$ | $0.0151 \pm 0.0023$   |
| Step width      | m                            | $0.0250 \pm 0.0038$ | $0.0356 \pm 0.0053$   |
| Speed trend     |                              |                     |                       |
| Step length     | m                            | $0.0099 \pm 0.0037$ | $0.0103 \pm 0.0027$   |
| Step width      | m                            | $0.0038 \pm 0.0026$ | $0.0044 \pm 0.0035$   |
| Short-term      |                              |                     |                       |
| Step length     | m                            | $0.0123 \pm 0.0024$ | $0.0156 \pm 0.0024$   |
| Step width      | m                            | $0.0229 \pm 0.0038$ | $0.0333 \pm 0.0056$   |
| Long-term       |                              |                     |                       |
| Step length     | m                            | $0.0098 \pm 0.0034$ | $0.0093 \pm 0.0023$   |
| Step width      | m                            | $0.0090 \pm 0.0021$ | $0.0116 \pm 0.0024$   |
