# Supplementary material for: Two Independent Contributions to Step Variability during Over-Ground Human Walking
Source: PubMed Central journal article supplement (PMC3756042; doi:10.1371/journal.pone.0073597), 2013-08-28
Supplement: pone.0073597.s004.pdf [file pone.0073597.s004.pdf]

**Supporting Information**  
**Two independent contributions to step variability during over-ground human walking**  
**S. H. Collins and A. D. Kuo**

**Table S4** Results from parameter study on the filter to separate short- and long-term components. Step variabilities of Table S2 (variance) and Table S3 (RMS variability) are recomputed here with filter cut-off period of 10 steps (rather than 30 steps). The choice of filter causes minor differences in tabulated results, but statistically significant findings remain unchanged: The correlation between speed-related and long-term step lengths remained significant with  $R^2 = 0.78$  ( $P = 0.0005$ ), and the correlation for step widths remained insignificant with  $R^2 = 0.03$  ( $P = 0.14$ )

| Parameter<br>(10-step cut-off) | units | Eyes Open<br>condition  | Eyes Closed<br>condition |
|--------------------------------|-------|-------------------------|--------------------------|
| <b>Variance</b>                |       |                         |                          |
| Short-term                     |       |                         |                          |
| Step length                    | $L^2$ | $0.000120 \pm 0.000047$ | $0.000202 \pm 0.000070$  |
| Step width                     | $L^2$ | $0.000483 \pm 0.000172$ | $0.001063 \pm 0.000380$  |
| Long-term                      |       |                         |                          |
| Step length                    | $L^2$ | $0.000159 \pm 0.000097$ | $0.000156 \pm 0.000058$  |
| Step width                     | $L^2$ | $0.000163 \pm 0.000055$ | $0.000262 \pm 0.000097$  |
| <b>RMS Variability</b>         |       |                         |                          |
| Short-term                     |       |                         |                          |
| Step length                    | m     | $0.0103 \pm 0.0019$     | $0.0134 \pm 0.0022$      |
| Step width                     | m     | $0.0207 \pm 0.0036$     | $0.0307 \pm 0.0054$      |
| Long-term                      |       |                         |                          |
| Step length                    | m     | $0.0116 \pm 0.0035$     | $0.0117 \pm 0.0022$      |
| Step width                     | m     | $0.0120 \pm 0.0020$     | $0.0152 \pm 0.0029$      |
